# Supplementary material
Source: PubMed Central journal article supplement (PMC2954245)

**A**

MDCK:Src=100:1

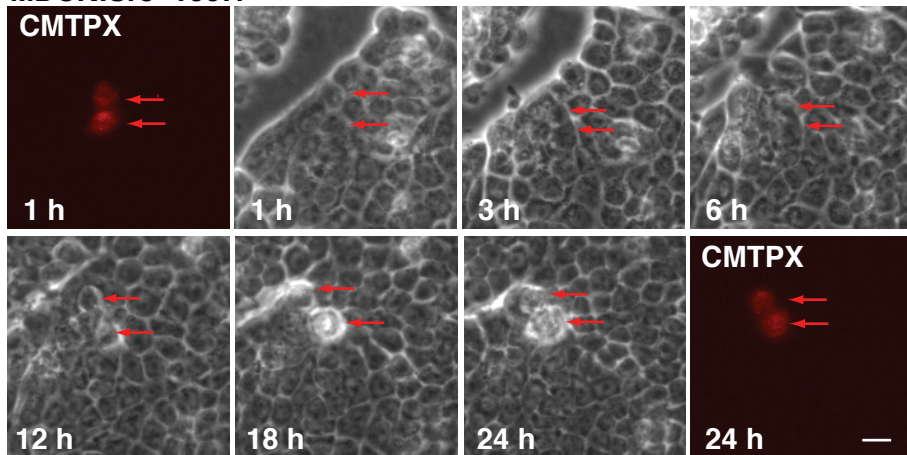**B**

MDCK:Src=100:1

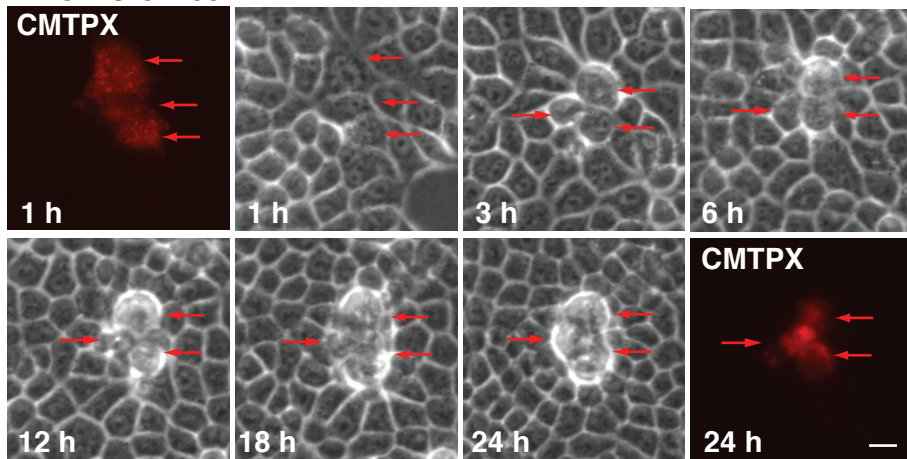

Supplement: supp_123_2_171__1.pdf [file supp_123_2_171__1.pdf]

**A**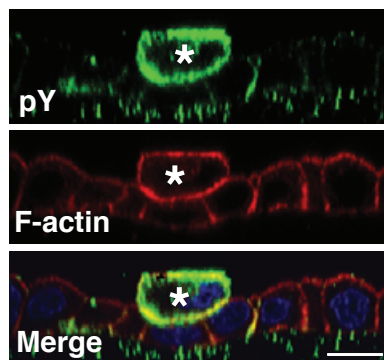**B**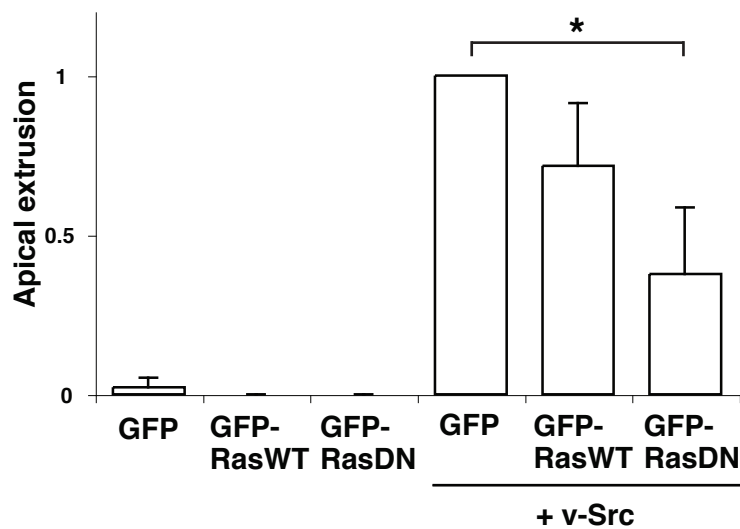**C**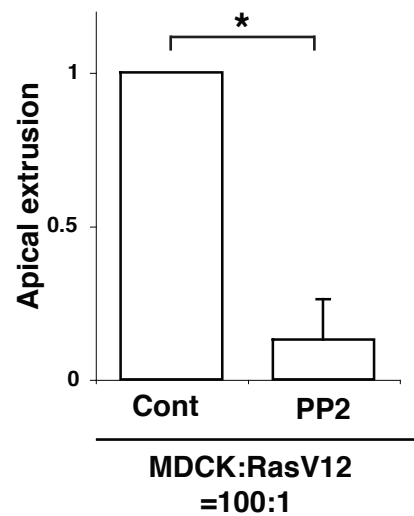

Supplement: supp_123_2_171__2.pdf [file supp_123_2_171__2.pdf]

MDCK:Src=100:1

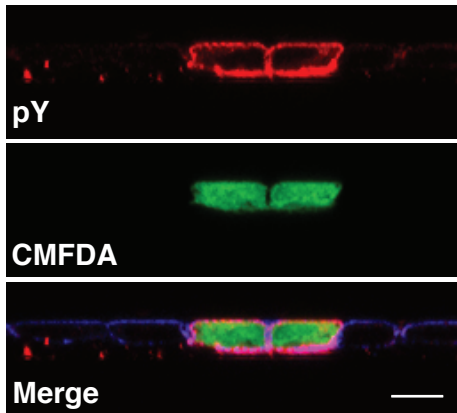

Supplement: supp_123_2_171__3.pdf [file supp_123_2_171__3.pdf]

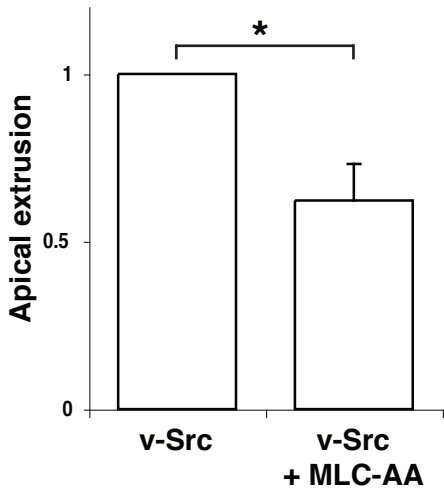

Supplement: supp_123_2_171__4.pdf [file supp_123_2_171__4.pdf]

**A**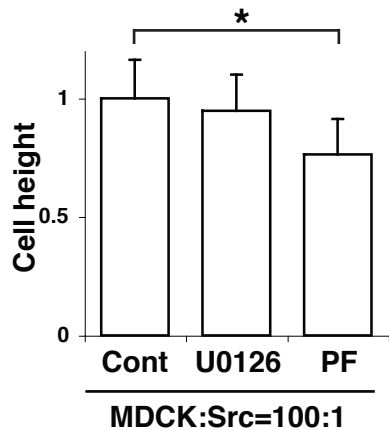**B**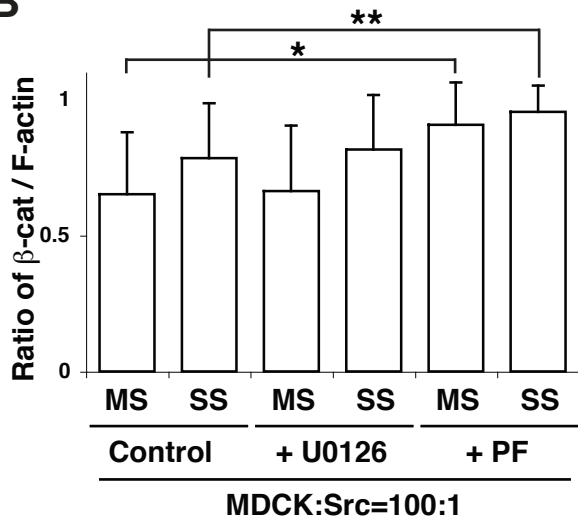

Supplement: supp_123_2_171__5.pdf [file supp_123_2_171__5.pdf]

**A**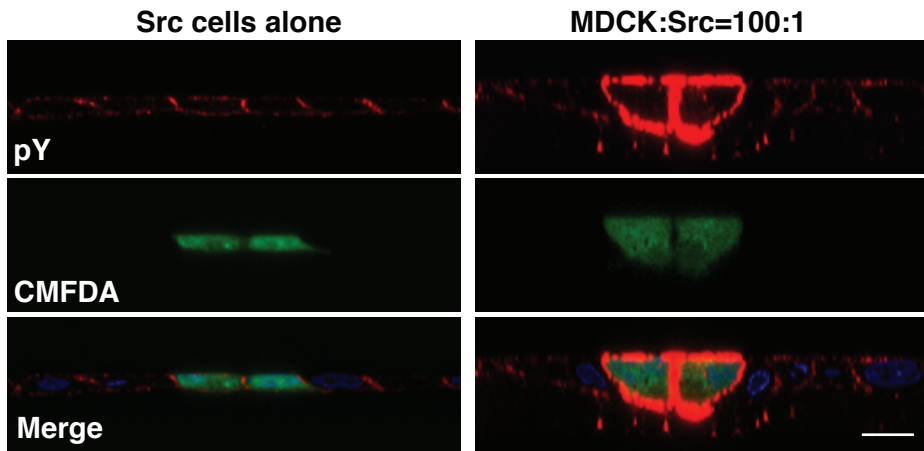**B**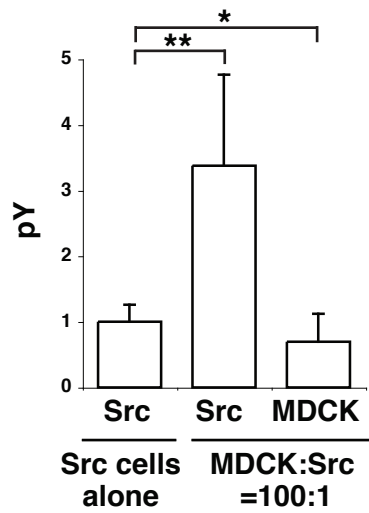**C**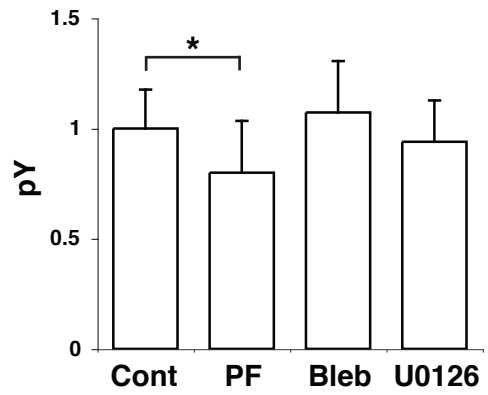**D**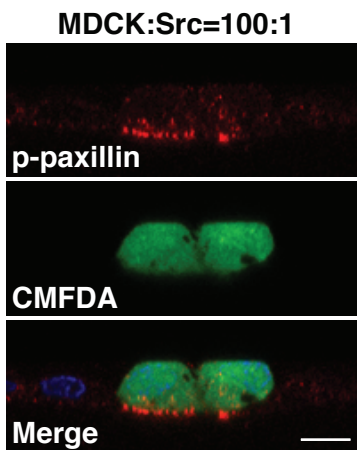

Supplement: supp_123_2_171__6.pdf [file supp_123_2_171__6.pdf]
